# Supplementary material
Source: PubMed Central journal article supplement (PMC6395519)
Supplement: NIHMS1012860-supplement-Supp_TableS1.pdf [file NIHMS1012860-supplement-Supp_TableS1.pdf]

**Supplementary Table S1.** List of metabolites identified using 2D-GC-TOF-MS platform. HMDB, PubChem, ChEBI, KEGG and METLIN identifiers are provided with the raw unprocessed peak abundance data. Derivatized metabolites are highlighted in yellow.

| Metabolites Groups              | Derivatized | MSI Matching Lev | MSI Matching Lev Match      | HMDB        | PubChem PubChem | ChEBI ChEBI | KEGG KEGG      | METLIN METLIN | S1C S1     | S1D S1   | S1E S1     | S2A S2   | S2B S2    | S2C S2   | S3A S3   | S3B S3   | S3C S3   |
|---------------------------------|-------------|------------------|-----------------------------|-------------|-----------------|-------------|----------------|---------------|------------|----------|------------|----------|-----------|----------|----------|----------|----------|
| Butanoic acid                   | Yes         | Level 2          | Butyric acid                | HMDB0000039 | 264             |             | 30772 C00246   | 107           | 614169     | 661804   | 724580     | 566986   | 132738    | 684411   | 1151271  | 1154392  | 1187018  |
| Acetic acid                     | Yes         | Level 2          | Acetic acid                 | HMDB0000042 | 176             |             | 15366 C00033   | 3206          | 2896922 NA | 11057002 | 1039731    | 952564   | 1071585   | 972112   | 28711    |          | 37148    |
| Cholesterol                     | Yes         | Level 2          | Cholesterol                 | HMDB0000067 | 11025495        |             | 1370929 C00187 | 163           | 1011009    | 1710691  | 1676832    | 1636837  | 1613140   | 1625919  | 1985389  | 1103624  | 2737914  |
| 2-Piperidinecarboxylic acid     | Yes         | Level 2          | Pipecolic acid              | HMDB0000070 | 849             |             | 17964 C00408   | 50            | 20788      | 19236 NA |            | 90375    | 60944     | 37140    | 34371    | 30420    | 26074    |
| Ethanol                         | Yes         | Level 2          | Ethanol                     | HMDB0000108 | 702             |             | 16236 C00469   | 3203          | 79095      | 93402    | 11913      | 34949    | 27343     | 16680    | 97325    | 18141    | 13212    |
| D-Glucose                       | Yes         | Level 2          | D-Glucose                   | HMDB0000122 | 5793            |             | 4167 C00013    | 133           | 893936 NA  |          |            | 63693    | 348350    | 3716354  | 667283   | 6701342  | 1095528  |
| Glycerol                        | Yes         | Level 2          | Glycerol                    | HMDB0000131 | 753             |             | 17522 C00116   | 105           | 1605184    | 6906127  | 8548479 NA |          | 2037477   | 1785064  | 2499252  | 23182    | 11048885 |
| D-Galactose                     | Yes         | Level 2          | D-Galactose                 | HMDB0000143 | 438357          |             | 195215 C00518  | 134           | 195215     | 605618   | 19058      | 13993    | 38717 NA  | NA       | NA       | 68092    | 7650     |
| L-Tyrosine                      | Yes         | Level 2          | L-Tyrosine                  | HMDB0000158 | 6057            |             | 17895 C00082   | 34            | 51274      | 48884    | 53998 NA   |          | 33552 NA  | NA       | 38209    | 51412    | 87372    |
| L-Phenylalanine                 | Yes         | Level 2          | L-Phenylalanine             | HMDB0000159 | 6140            |             | 17285 C00079   | 28            | 24266      | 35062    | 51037      | 50044    | 56789     | 52290    | 68811    | 51410    | 151549   |
| L-Proline                       | Yes         | Level 2          | L-Proline                   | HMDB0000162 | 145742          |             | 17203 C00148   | 29            | 720238     | 653250   | 697368     | 2167181  | 1672147   | 12477    | 2192473  | 1434060  | 1293554  |
| L-Threonine                     | Yes         | Level 2          | L-Threonine                 | HMDB0000167 | 6288            |             | 16857 C00188   | 32            | 2591886    | 2849667  | 2901038    | 3900295  | 3704968   | 3625549  | 4590806  | 4933638  | 4267054  |
| D-Mannose                       | Yes         | Level 2          | D-Mannose                   | HMDB0000169 | 18950           |             | 1817673 C00519 | NA            | 1817673    | 5885421  | 78257      | 3157631  | 2851067   | 3990551  | 3635727  | 1150688  | 9571425  |
| L-Aspartic acid                 | Yes         | Level 2          | L-Aspartic acid             | HMDB0000191 | 5960            |             | 17053 C00049   | 5206          | 2148       | 25246    | 14394      | 58080    | 60378     | 50592    | 65512    | 58191    | 55118    |
| Benzeneacetic acid              | Yes         | Level 2          | Phenylacetic acid           | HMDB0000209 | 999             |             | 30745 C00708   | 129           | 87392      | 98459    | 18592      | 11925    | 26415 NA  | NA       | 37781    | 44044    | 26915    |
| Myo-Inositol                    | Yes         | Level 2          | myo-Inositol                | HMDB0000211 | NA              |             | 17268 C00137   | 5221          | 3702529    | 3886817  | 3738657    | 3753812  | 3944842   | 3710460  | 4938069  | 4533095  | 4315292  |
| Hexadecanoic acid               | Yes         | Level 2          | Palmitic acid               | HMDB0000220 | 985             |             | 15756 C00249   | 187           | 1004605    | 3905809  | 5340097    | 3197963  | 306253    | 3586072  | 2724810  | 2716872  | 3172045  |
| Propanoic acid                  | Yes         | Level 2          | Propionic acid              | HMDB0000237 | 1032            |             | 30768 C00163   | 3215          | 2810125    | 738055   | 11377821   | 91110    | 3957301   | 10976746 | 1050171  | 6867255  | 34136433 |
| Pyridoxine                      | Yes         | Level 2          | Pyridoxine                  | HMDB0000239 | 1054            |             | 16709 C00314   | 5245 NA       | NA         | 2443423  | 276897     | 1218567  | 1231021   | 1240947  | 3630736  | 3448188  | 3193249  |
| Urea                            | Yes         | Level 2          | Urea                        | HMDB0000294 | 1176            |             | 16169 C00086   | 6             | 1198881    | 36344697 | 10742612   | 21312202 | 2056071   | 43119005 | 20459674 | 49672100 | 16159624 |
| trans-3-Hexenedioic acid        | Yes         | Level 2          | 3-Hexenedioic acid          | HMDB0000393 | 5351896         |             | 86952          | 5382 NA       | NA         | NA       | 49978 NA   | NA       | 24622     | 24221 NA | NA       | 56148    | 11884    |
| N-alpha-Acetyl-L-Lysine         | Yes         | Level 2          | N-(alpha-acetyl)lysine      | HMDB0000446 | 192596          |             | 35704 C12899   | 51            | 21052      | 69718 NA | NA         | 47731    | 178011 NA | NA       | NA       | 25203 NA | NA       |
| Hexadecanoic acid               | Yes         | Level 2          | Adipic acid                 | HMDB0000448 | 196             |             | 30832 C00104   | 115           | 2205       | 11705    | 19602      | 37584    | 18088     | 8        | 213622   | 20628    | 20262    |
| Decanoic acid                   | Yes         | Level 2          | Capric acid                 | HMDB0000511 | 2969            |             | 30813 C01571   | 336           | 30108      | 25942    | 13320      | 17865    | 15950     | 15723 NA | NA       | 17730    | 30045    |
| Hexanoic acid                   | Yes         | Level 2          | Caproic acid                | HMDB0000535 | 8892            |             | 30776 C01585   | 550           | 663198     | 1367826  | 1409116    | 17978    | 10242     | 55378    | 45303    | 1336927  | NA       |
| 9-Octadecenoic acid             | Yes         | Level 2          | Elaidic acid                | HMDB0000573 | 446399          |             | 27997 C00722   | 3406          | 1620899    | 883176   | 691106     | 607319   | 621445    | 54884    | 751069   | 69145    | 727997   |
| Methylmalonic acid              | Yes         | Level 2          | Citric acid                 | HMDB0000634 | 643798          |             | 17626 C00226   | 5607          | 38661 NA   | NA       | 28488      | 52068    | 57527     | 46831    | 46259    | 53652    | 64984    |
| Dodecanoic acid                 | Yes         | Level 2          | Dodecanoic acid             | HMDB0000638 | 3893            |             | 30805 C02679   | 5611          | 146405     | 59667    | 51053      | 33583    | 39905     | 40393    | 60784    | 58852    | 68977    |
| Pentadecanoic acid              | Yes         | Level 2          | Glutaric acid               | HMDB0000661 | 743             |             | 17859 C00489   | 3254 NA       | NA         | 44398 NA | NA         | NA       | 35636     | 4457     | 23289    | 28134    | 49654    |
| Heptanoic acid                  | Yes         | Level 2          | Heptanoic acid              | HMDB0000666 | 8094            |             | 45571 C01744   | 5636          | 31773      | 29248    | 29364      | 20266    | 18132     | 22228    | 34910    | 34371    | 33955    |
| 4-Methylvaleric acid            | Yes         | Level 2          | Isocaproic acid             | HMDB0000689 | 12587           |             | 74903          | 4191          | 16409      | 12429 NA | NA         | 14561    | 12985     | 53129    | 298227   | NA       | 51373    |
| Malonic acid                    | Yes         | Level 2          | Malonic acid                | HMDB0000691 | 867             |             | 30794 C00383   | 3237          | 28651      | 19703    | 37870      | 23628    | 10474     | 27215    | 2741228  | 53259    | 29765    |
| Pseudouridine                   | Yes         | Level 2          | Pseudouridine               | HMDB0000767 | 15047           |             | 17802 C02067   | 5734          | 569616     | 64404 NA | NA         | NA       | NA        | 79142    | 11574    | 1670     | 96035    |
| Acetic acid                     | Yes         | Level 2          | Acetic acid                 | HMDB0000784 | 2266            |             | 48131 C08261   | 5750          | 10282      | 13555    | 13513      | 66444    | 77301     | 83597    | 14458    | 16345    | 17123    |
| 2-Pyrrolidone-5-carboxylic acid | Yes         | Level 2          | Pyrrrolidonecarboxylic acid | HMDB0000805 | 499             |             | 16010 C02237   | 5769          | 290840     | 137238   | 142493     | 139866   | 145799    | 199990   | 194818   | 183171   | NA       |
| Tetradecanoic acid              | Yes         | Level 2          | Myristic acid               | HMDB0000806 | 11005           |             | 28875 C06424   | 196           | 38582      | 57753    | 17601      | 15339    | 31613     | 4427 NA  | NA       | 77162    | 36285    |
| n-Pentadecanoic acid            | Yes         | Level 2          | Pentadecanoic acid          | HMDB0000826 | 13849 NA        |             | C16537         | 5789          | 79196      | 48143    | 48260 NA   | 34097    | 19836     | 45082    | 52577    | 61301    | NA       |
| Octadecanoic acid               | Yes         | Level 2          | Stearic acid                | HMDB0000827 | 5281            |             | 28842 C01530   | 189           | 50401      | 47979    | 48897      | 46101    | 49916     | 41927    | 61931    | 67127    | 59334    |
| Nonadecanoic acid               | Yes         | Level 2          | Nonadecanoic acid           | HMDB0000847 | 8158            |             | 29019 C01601   | 5010          | 36826      | 119496   | 119110     | 10544    | 19711     | 153734   | 10711    | 132738   | NA       |
| Ribonic acid                    | Yes         | Level 2          | Ribonic acid                | HMDB0000867 | 5466977         |             | 21077 C01685   | 3290          | 67036      | 70962    | 51382      | 542576   | 626399    | 626239   | 723031   | 131273   | 591679   |
| L-Valine                        | Yes         | Level 2          | L-Valine                    | HMDB0000883 | 6287            |             | 16144 C00183   | 5842          | 2484629    | 5851378  | 3084136    | 255091   | 4065316   | 8025858  | 4241     | 4454399  | 4581361  |
| N-Trimethylamine                | Yes         | Level 2          | Trimethylamine              | HMDB0000906 | 1126            |             | 18319 C00565   | 3772          | 2897643    | 3182055  | 4068571    | 9036     | 18952     | 3625166  | 1267240  | 3832695  | 4427866  |
| L-Tryptophan                    | Yes         | Level 2          | L-Tryptophan                | HMDB0000929 | 6305            |             | 16828 C00078   | 5879          | 29122      | 292864   | 364014     | 98855    | 322011    | 366515   | 313471   | 105211   | 320949   |
| Arachidonic acid                | Yes         | Level 2          | Arachidonic acid            | HMDB0001043 | 444899          |             | 15843 C00219   | 193           | 24810      | 59902    | 68042      | 50608    | 25742     | 53615    | 62356    | 62512    | 67206    |
| Phenylethanolamine              | Yes         | Level 2          | Phenylethanolamine          | HMDB001085  | 1000            |             | 16344 C00175   | 59            | 697867 NA  | 680042   | NA         | 13852    | 71167     | 15857    | NA       | 57683    | NA       |
| Aminomalonic acid               | Yes         | Level 2          | Aminomalonic acid           | HMDB0001147 | 100714          |             | 17475 C00872   | NA            | 165300     | 188613   | 207714     | 109118   | 288347    | 306621   | 364260   | 367248   | 381356   |
| 3-penten-2-one                  | Yes         | Level 2          | Methyl propenyl ketone      | HMDB0001184 | 637920 NA       |             | NA             | NA            | 2227055    | 282412   | 2070074    | 93044    | 1055152   | 141295   | 368965   | 1877706  | NA       |
| 7H-purine                       | Yes         | Level 2          | Purine                      | HMDB0001366 | 1044            |             | 17258 C15687   | 6193 NA       | NA         | 91631 NA | NA         | 58594    | 44031     | 91025    | 67363    | 86227    | 68649    |
| Alpha-Linolenic acid            | Yes         | Level 2          | Alpha-Linolenic acid        | HMDB0001388 | 5280934         |             | 27432 C06427   | 6208 NA       | NA         | 14199    | 39930      | 92918    | 6174      | 13176    | 96485    | 78775    | 19566    |
| 1,4-Butanediamine               | Yes         | Level 2          | Putrescine                  | HMDB0001414 | 1045            |             | 17144 C00130   | NA            | 28509      | 37919    | 11545 NA   | NA       | NA        | 1991 NA  | NA       | NA       | NA       |
| Gamma-Tocopherol                | Yes         | Level 2          | Gamma-Tocopherol            | HMDB0001492 | 14986           |             | 298402         | 1276          | 18048 NA   | 17074    | 16226      | 17243    | 16403     | 21604    | 21052    | 21158    | NA       |
| Benzoic acid                    | Yes         | Level 2          | Benzoic acid                | HMDB0001870 | 243             |             | 30746 C00184   | 6297          | 2554319    | 3259762  | 3730575    | 1148045  | 1822245   | 2636649  | 3263961  | 3835589  | NA       |
| 1,2-Benzendicarboxylic acid     | Yes         | Level 2          | 2-Pyrrolidone               | HMDB0002039 | 12025           |             | 30692 C11118   | 6452 NA       | NA         | NA       | NA         | 77196    | 98327 NA  | NA       | 17491    | 53567    | 75483    |
| 1,2-Benzene dicarboxylic acid   | Yes         | Level 2          | Phthalic acid               | HMDB002107  | 1017            |             | 29569 C01606   | 6489          | 195939     | 201025   | 212176     | 251255   | 247304    | 239786   | 303962   | 287007   | 275253   |
| Phosphoric acid                 | Yes         | Level 2          | Phosphoric acid             | HMDB0002142 | 1004            |             | 26078 C00009   | NA            | 3457       | 55146 NA | NA         | NA       | 15862     | 18312    | 46081    | 51412    | NA       |
| Docosahexanoic acid             | Yes         | Level 2          | Docosahexanoic acid         | HMDB0002183 | 445580          |             | 445580         | NA            | 82476      | 16458    | 538332     | 77768    | 39586     | 79374    | 62431    | 69344    | 76377    |
| Heptadecanoic acid              | Yes         | Level 2          | Heptadecanoic acid          | HMDB0002259 | 10045           |             | 32365          | 6578          | 20895 NA   | NA       | 56212 NA   | NA       | 42079 NA  | NA       | 78407    | 45849 NA | NA       |
| Cadaverine                      | Yes         | Level 2          | Cadaverine                  | HMDB0002322 | 273             |             | 18127 C01622   | 3236          | 37927      | 10317 NA | NA         | NA       | 16380     | 20080    | 70394    | 87500    | NA       |
| Ethanedioic acid                | Yes         | Level 2          | Oxalic acid                 | HMDB0002329 | 971             |             | 16995 C00209   | 113           | 3912236    | 3757020  | 1378698    | 5152022  | 4578014   | 4374286  | 6158487  | 36446124 | 3758781  |
| 1,4-Benzendicarboxylic acid     | Yes         | Level 2          | Terephthalic acid           | HMDB0002428 | 7489            |             | 15710 C08337   | 6676          | 50003      | 59407 NA | NA         | 70289    | 34134     | 37278    | 30979    | 29439    | 2678     |
| 1,5-Anhydro-D-sorbitol          | Yes         | Level 2          | 1,5-Anhydro-D-sorbitol      | HMDB0002712 | 64960           |             | 16070 C01026   | 3775          | 291767     | 304847   | 306027     | 332771   | 200688    | 327671   | 440967   | 397432   | 495953   |
| Erythritol                      | Yes         | Level 2          | Erythritol                  | HMDB0002994 | 222285          |             | 17113 C00503   | 140           | 63824      | 17888 NA | NA         | NA       | 15011 NA  | NA       | 24202    | 37377    | 6        |
| Propanal                        | Yes         | Level 2          | Propanal                    | HMDB0003366 | 277             |             | 11573 C00494   | 6906 NA       | NA         | 94247    | 63935 NA   | NA       | 53722     | 47215 NA | NA       | 16495    | 92877    |
| Carbamate                       | Yes         | Level 2          | Carbamic acid               | HMDB0003551 | 527             |             | 28616 C01563   | 6950 NA       | NA         | 15677 NA | NA         | 17997    | 15154     | 11651    | 57022    | 22506 NA | NA       |
| Arabinofuranose                 | Yes         | Level 2          | Arabinofuranose             | HMDB0013225 | 440921          |             | 6178 C08115    | NA            | NA         | NA       | 80514      | 2363 NA  | 15727     | 31827 NA | NA       | 50194    | NA       |
| Palmitoleic acid                | Yes         | Level 2          | Palmitoleic acid            | HMDB0013238 | 5282745         |             | 59265          | NA            | 57613      | 53783    | 96242      | 44310    | 52061 NA  | NA       | 73571    | 71035    | 67419    |
| Cyclohexanol                    | Yes         | Level 2          | Cyclohexanol                | HMDB001414  | 1045            |             | 17144 C00130   | NA            | 228        | NA       | 19175 NA   | NA       | 15687     | 16616    | NA       | NA       | NA       |



|                                                            |    |         |    |    |    |    |    |    |         |         |         |          |          |         |          |          |         |        |
|------------------------------------------------------------|----|---------|----|----|----|----|----|----|---------|---------|---------|----------|----------|---------|----------|----------|---------|--------|
| 4-Ethoxybenzhydrazide                                      | No | Level 3 | NA | NA | NA | NA | NA | NA | 17055   | 70101   | NA      | NA       | 110199   | 6995    | 51003    | NA       | 33296   | NA     |
| 4-Ethoxyphenethyl alcohol                                  | No | Level 3 | NA | NA | NA | NA | NA | NA | 96850   | 93385   | 89290   | 110199   | 102860   | 99884   | 122426   | 111402   | 138772  | NA     |
| 4-Methoxy-7-methylindan-1-one                              | No | Level 3 | NA | NA | NA | NA | NA | NA | 215108  | 13560   | 220589  | 42074    | NA       | 209561  | 16443    | NA       | 247732  | NA     |
| 4-Morpholinethanethiol                                     | No | Level 3 | NA      | NA      | 53463   | 20053    | 8475.5   | 31233   | 181841   | 20487    | 6062.7  | NA     |
| 4-Morpholinethanol                                         | No | Level 3 | NA      | NA      | 3028    | 1823.4   | NA       | 57122   | 15904    | NA       | 48476   | NA     |
| 4-Nonene, 2,3,3-trimethyl-, (Z)-                           | No | Level 3 | NA | NA | NA | NA | NA | NA | 18650   | 13123   | 37128   | NA       | NA       | 10454   | 48974    | NA       | 16246   | NA     |
| 4-Octene, 2,3,6-trimethyl-                                 | No | Level 3 | NA | NA | NA | NA | NA | NA | 117852  | 67751   | 681004  | 57837    | 190620   | 2465.1  | 168813   | 284133   | 328579  | NA     |
| 4-Piperidinone, 2,2,6,6-tetramethyl-                       | No | Level 3 | NA      | NA      | 35155   | NA       | 44023    | NA      | 44183    | 58240    | 46915   | 50869  |
| 4-Undecane, 10-methyl-, (E)-                               | No | Level 3 | NA      | NA      | NA      | 20883    | NA       | 15881   | 46472    | 9874.2   | 18295   | 1351.7 |
| 5H-1,4-Diazepin-5-one, hexahydro-                          | No | Level 3 | NA | NA | NA | NA | NA | NA | 3993.4  | 7703.9  | 7827.8  | 12432    | NA       | NA      | NA       | NA       | 17822   | NA     |
| 5-Hydroxytryptamine                                        | No | Level 3 | NA | NA | NA | NA | NA | NA | 9961.4  | NA      | 12034   | NA       | 9513.4   | 9418.2  | 14114    | 12698    | 11538   | NA     |
| 5-O-Methyl-D-gluconic acid dime                            | No | Level 3 | NA | NA | NA | NA | NA | NA | 14322   | NA      | NA      | 28752    | 31365    | 11223   | NA       | NA       | 487044  | NA     |
| 6-tert-Butyl-4-methylcoumarin                              | No | Level 3 | NA | NA | NA | NA | NA | NA | 64804   | 63253   | 7453.9  | NA       | NA       | 11638   | NA       | 10108    | 2481.8  | NA     |
| Acetic acid, oxo-, methyl ester                            | No | Level 3 | NA      | 90478   | NA      | 100848   | NA       | 13779   | NA       | 18745    | 17656   | NA     |
| ACETONITRILE                                               | No | Level 3 | NA      | 8233.4  | 9035.6  | NA       | 3066     | 5213.8  | NA       | 3292.9   | NA      | NA     |
| Altrose                                                    | No | Level 3 | NA | NA | NA | NA | NA | NA | 51187   | 10210   | 224428  | NA       | 93120    | 11361   | 117442   | NA       | 202739  | NA     |
| Articaine                                                  | No | Level 3 | NA      | NA      | 36909   | 43340    | 9119.5   | 48559   | 57307    | 54582    | NA      | NA     |
| Benzene, (1,1-dimethyl-2-butynyl)                          | No | Level 3 | NA | NA | NA | NA | NA | NA | 20877   | 21574   | 30109   | NA       | 17660    | NA      | NA       | 23003    | NA      | NA     |
| Benzene, (1-ethyl-1-propenyl)-                             | No | Level 3 | NA | NA | NA | NA | NA | NA | 10224   | NA      | NA      | 14362    | 12813    | 14685   | 9101.3   | 20441    | NA      | NA     |
| Benzenebutanoic acid, 4-methoxy-                           | No | Level 3 | NA | NA | NA | NA | NA | NA | 19045   | 21192   | NA      | NA       | 12813    | 25909   | 23318    | NA       | 30395   | 27077  |
| Benzoic acid, 3,5-bis(1,1-dimethyl-2-propenyl)-            | No | Level 3 | NA | NA | NA | NA | NA | NA | 209699  | 194877  | 103595  | 225053   | 210573   | 203974  | 250707   | 231882   | 212502  | NA     |
| Benzoic acid, 4-ethoxy-, ethyl ester                       | No | Level 3 | NA | NA | NA | NA | NA | NA | 3307607 | 3498393 | 6638088 | 23567968 | 25025693 | 5571453 | 29450015 | 29837703 | 4326386 | NA     |
| Benzoic acid, 4-ethoxy-, ethyl ester                       | No | Level 3 | NA | NA | NA | NA | NA | NA | 6286.3  | 11386   | 199515  | NA       | NA       | 15998   | 42622    | NA       | NA      | NA     |
| Benzoic acid, 2-                                           | No | Level 3 | NA | NA | NA | NA | NA | NA | 468048  | 21857   | 8244.7  | 2364.6   | 53673    | 5275.5  | 15971    | NA       | 3988.3  | NA     |
| Carbonyl sulfide                                           | No | Level 3 | NA | NA | NA | NA | NA | NA | 14219   | 17124   | 12009   | 19856    | NA       | 17235   | NA       | 1849.8   | NA      | NA     |
| Cetene                                                     | No | Level 3 | NA | NA | NA | NA | NA | NA | 107393  | 302161  | 26829   | NA       | 2560138  | 271377  | 1795799  | 333489   | 2002054 | NA     |
| Cetizine N-Oxide                                           | No | Level 3 | NA | NA | NA | NA | NA | NA | 46612   | 37758   | 30909   | 39986    | 37747    | 78372   | 4048844  | 41050    | 35306   | NA     |
| cis-2-Methylcyclohexanol                                   | No | Level 3 | NA | NA | NA | NA | NA | NA | 25679   | 8997.1  | NA      | 118668   | 2159.5   | 3981.3  | NA       | 19150    | 1474.8  | NA     |
| Cyclohexane, (2-methylpropyl)-                             | No | Level 3 | NA      | NA      | 6895.5  | 11291    | 9514.1   | 9075.1  | NA       | 2923.1   | 2684.3  | NA     |
| Cyclohexane, 1-ethyl-1,3-dimethyl-                         | No | Level 3 | NA | NA | NA | NA | NA | NA | 1299    | NA      | 11513   | 4824.2   | 3268.8   | 207435  | 1732.3   | 9556.1   | 21900   | NA     |
| Cyclohexane, 1-ethyl-2-propyl-                             | No | Level 3 | NA | NA | NA | NA | NA | NA | 194770  | 151626  | 550242  | 536033   | 221573   | 235656  | 192417   | 504988   | 176227  | NA     |
| Cyclohexane, 2-ethyl-1,3-dimethyl-                         | No | Level 3 | NA | NA | NA | NA | NA | NA | 4476    | 11197   | NA      | NA       | 11375    | 17819   | NA       | 10629    | NA      | NA     |
| Cyclohexane, ethoxycarbonyl-                               | No | Level 3 | NA | NA | NA | NA | NA | NA | 19762   | 18201   | 22500   | 6001.7   | 11576    | 10256   | 4570.2   | 5829     | 12565   | NA     |
| Cyclohexane, nonadecyl-                                    | No | Level 3 | NA      | 20936   | NA      | 4906.6   | 8843.3   | 4556.8  | NA       | 5425.6   | NA      | NA     |
| Cyclohexane, undecyl-                                      | No | Level 3 | NA      | NA      | NA      | NA       | NA       | NA      | NA       | NA       | NA      | NA     |
| Cyclooctane, (1-methylpropyl)-                             | No | Level 3 | NA | NA | NA | NA | NA | NA | 345895  | 14813   | 14000   | 289422   | 242124   | 24752   | 54171    | 161438   | NA      | NA     |
| Cyclooctane, 1,4-dimethyl-, cis-                           | No | Level 3 | NA | NA | NA | NA | NA | NA | 298818  | 1335023 | 306302  | 499665   | 340331   | 34379   | 33489    | 558462   | 1560706 | NA     |
| Cyclooctane, 1,4-dimethyl-, trans-                         | No | Level 3 | NA | NA | NA | NA | NA | NA | 310758  | 103706  | 129397  | 11378    | 447357   | 440251  | 1873.1   | 97244    | 8199.1  | NA     |
| Cyclopentane, 1-butyl-2-ethyl-                             | No | Level 3 | NA      | NA      | 162511  | 234500   | 29730    | 139119  | NA       | 248303   | 157606  | NA     |
| Cyclopentane, 1-hydroxymethyl-                             | No | Level 3 | NA | NA | NA | NA | NA | NA | 6245.1  | 6427.8  | 6795.1  | NA       | 3826.6   | 6216.4  | NA       | 6592.6   | NA      | NA     |
| Cyclopentane, 1-pentyl-2-propyl-                           | No | Level 3 | NA      | 13060   | NA      | NA       | 27792    | 5336.3  | NA       | 63076    | NA      | NA     |
| Cyclopentane, hexoxycarbonyl-                              | No | Level 3 | NA | NA | NA | NA | NA | NA | 17164   | 13963   | 13026   | 5615.1   | 1902.2   | 13506   | 4444.2   | 5694.9   | 3799.7  | NA     |
| Cyclopentane, hexyl-                                       | No | Level 3 | NA | NA | NA | NA | NA | NA | 4175    | 44100   | NA      | 101350   | 19191    | 15929   | NA       | 10436    | 110754  | NA     |
| Decanal, O-methylxime                                      | No | Level 3 | NA | NA | NA | NA | NA | NA | 505433  | 489329  | 520587  | 507332   | 515168   | 486407  | 716928   | 865343   | 656545  | NA     |
| Decane, 2,3,5,8-tetramethyl-                               | No | Level 3 | NA | NA | NA | NA | NA | NA | 1988020 | 1591719 | 606076  | 363358   | 517496   | 2444447 | 844678   | 534248   | 155624  | NA     |
| Decane, 2,5,9-trimethyl-                                   | No | Level 3 | NA      | 7885.8  | 13950   | 13775    | 11621    | NA      | NA       | 9269     | NA      | NA     |
| Decane, 2,9-dimethyl-                                      | No | Level 3 | NA | NA | NA | NA | NA | NA | 107853  | 448671  | 681293  | 777992   | 3889114  | 10181   | 54640    | 32043    | 2527858 | NA     |
| Decane, 3,7-dimethyl-                                      | No | Level 3 | NA | NA | NA | NA | NA | NA | 42368   | NA      | 12594   | 34538    | NA       | 18893   | 40485    | NA       | NA      | NA     |
| Dimethyl-                                                  | No | Level 3 | NA | NA | NA | NA | NA | NA | 591992  | 289463  | 598157  | 508258   | 40944    | 48141   | 42888    | 65991    | 70228   | NA     |
| Disulfide, di-tert-dodecyl-                                | No | Level 3 | NA | NA | NA | NA | NA | NA | 259371  | 2509009 | 2534126 | 2533609  | 2486500  | 4652345 | 4145164  | 3596616  | 2595452 | NA     |
| Docosane                                                   | No | Level 3 | NA | NA | NA | NA | NA | NA | 22959   | 32623   | NA      | 2897.3   | 6592.7   | NA      | 8606.7   | 31014    | NA      | NA     |
| Dodecanal                                                  | No | Level 3 | NA      | 33495   | NA      | 6309.6   | 5422.2   | 22435   | 26188    | NA       | NA      | NA     |
| Dodecane, 2,6,10-trimethyl-                                | No | Level 3 | NA | NA | NA | NA | NA | NA | 4173    | 44100   | 11743   | 152075   | NA       | 19191   | 15929    | 20576    | 8468.4  | NA     |
| Dodecane, 2,7,10-trimethyl-                                | No | Level 3 | NA | NA | NA | NA | NA | NA | 4494329 | 3705040 | 6723065 | 8670784  | 7006069  | 5759409 | 5749768  | 7817054  | 3357548 | NA     |
| Dodecane, 4,6-dimethyl-                                    | No | Level 3 | NA | NA | NA | NA | NA | NA | 2455555 | 2628590 | 2515370 | 3547280  | 2781910  | 2762955 | 3403987  | 2995020  | 2909536 | NA     |
| Dodecanenitrile                                            | No | Level 3 | NA      | 14647   | NA      | 36844    | 13830    | NA      | 14633    | 15244    | 15914   | NA     |
| D-Trehalose                                                | No | Level 3 | NA | NA | NA | NA | NA | NA | 62622   | 78642   | NA      | 71932    | 82511    | 71386   | 76578    | 80438    | 76302   | NA     |
| Eicosane                                                   | No | Level 3 | NA | NA | NA | NA | NA | NA | 7458790 | 3837567 | 971816  | NA       | 16570    | 313962  | NA       | NA       | NA      | NA     |
| Ethanone, 1-(4-ethoxyphenyl)-                              | No | Level 3 | NA | NA | NA | NA | NA | NA | 5102    | 83887   | 2402.4  | 35640    | 34755    | NA      | 16672    | 9302.2   | 7436.3  | NA     |
| Ethanone, 1-(2,3-dihydro-2,3-dihydro-6-methylheptyl vinyl) | No | Level 3 | NA | NA | NA | NA | NA | NA | 300847  | 235360  | 187805  | 304715   | 314013   | 228841  | 308453   | 283959   | 318591  | NA     |
| Fumaric acid, 2-(diethylamino)ethyl                        | No | Level 3 | NA | NA | NA | NA | NA | NA | 32316   | 38570   | 9948    | 7839.3   | NA       | NA      | NA       | NA       | 46275   | NA     |
| heptacosane                                                | No | Level 3 | NA | NA | NA | NA | NA | NA | 1496348 | 1547247 | 1562531 | 569283   | 972515   | 1366146 | 171574   | 531695   | 860899  | NA     |
| Heptadecane, 2,6,10,14-tetramethyl-                        | No | Level 3 | NA | NA | NA | NA | NA | NA | 4175    | 44100   | 11743   | 152075   | NA       | 19191   | 15929    | 20576    | 8468.4  | NA     |
| Heptadecane, 2,6-dimethyl-                                 | No | Level 3 | NA | NA | NA | NA | NA | NA | 113046  | 2968.8  | NA      | NA       | 186009   | 1648053 | 245269   | 2805977  | NA      | NA     |
| Heptadecane, 2-methyl-                                     | No | Level 3 | NA | NA | NA | NA | NA | NA | 14052   | 11202   | NA      | 4220209  | 12650    | NA      | NA       | 14259    | NA      | NA     |
| HEPTANAL ETHYLENE GLYCOL                                   | No | Level 3 | NA      | 5165.6  | 33653   | NA       | 10976    | 30320   | 5508.2   | 28991    | 4709    | NA     |
| hexacosane                                                 | No | Level 3 | NA | NA | NA | NA | NA | NA | 2799252 | 1370281 | 1683318 | 525324   | 841813   | 1303284 | 48279    | 6151326  | 63104   | NA     |
| Hexanedioic acid, bis(2-ethylhexyl)                        | No | Level 3 | NA | NA | NA | NA | NA | NA | 28255   | 28384   | 27300   | 24979    | 24174    | 25279   | 28261    | 26477    | 27170   | NA     |
| Hydroxylamine, O-methyl-                                   | No | Level 3 | NA | NA | NA | NA | NA | NA | 31296   | 368871  | 147620  | 345841   | 17811    | 405005  | 283292   | 21039    | NA      | NA     |
| L-Glycine                                                  | No | Level 3 | NA | NA | NA | NA | NA | NA | 3062.1  | NA      | 16485   | NA       | 17864    | 17268   | 4736.8   | NA       | NA      | NA     |
| L-GLYCINE                                                  | No | Level 3 | NA | NA | NA | NA | NA | NA | 5903151 | 6127278 | 3647715 | 1223544  | 1263073  | 6933374 | 4788524  | 1363807  | 7154159 | NA     |
| L-Methionine sulfone                                       | No | Level 3 | NA      | NA      | NA      | 9225.6   | 3821.5   | 9875.3  | 24049    | 19017    | 13864   | NA     |
| Megastigma-4,6(E),8(Z)-triene                              | No | Level 3 | NA      | NA      | 13949   | NA       | NA       | 12383   | 28559    | 18444    | 14669   | NA     |
| methanalphosphate                                          | No | Level 3 | NA      | NA      | 8235.1  | 12611    | 8559.9   | NA      | 6586.3   | 9465.2   | NA      | NA     |
| Methyl (2Z)-dec-2-en-4,6-diminoate                         | No | Level 3 | NA | NA | NA | NA | NA | NA | 39226   | 38287   | 15846   | NA       | 15735    | 38776   | NA       | 48077    | 44372   | NA     |
| Methyl formate                                             | No | Level 3 | NA | NA | NA | NA | NA | NA | 16004   | 12990   | 16191   | 18059    | 12450    | 14710   | 128731   | 22122    | 21043   | NA     |
| METHYL VINYL KETONE                                        | No | Level 3 | NA      | 37      |         |          |          |         |          |          |         |        |
